# Supplementary material for: NEAL: an open-source tool for audio annotation
Source: PeerJ journal article supplement (doi:10.7717/peerj.15913), 2023-08-25

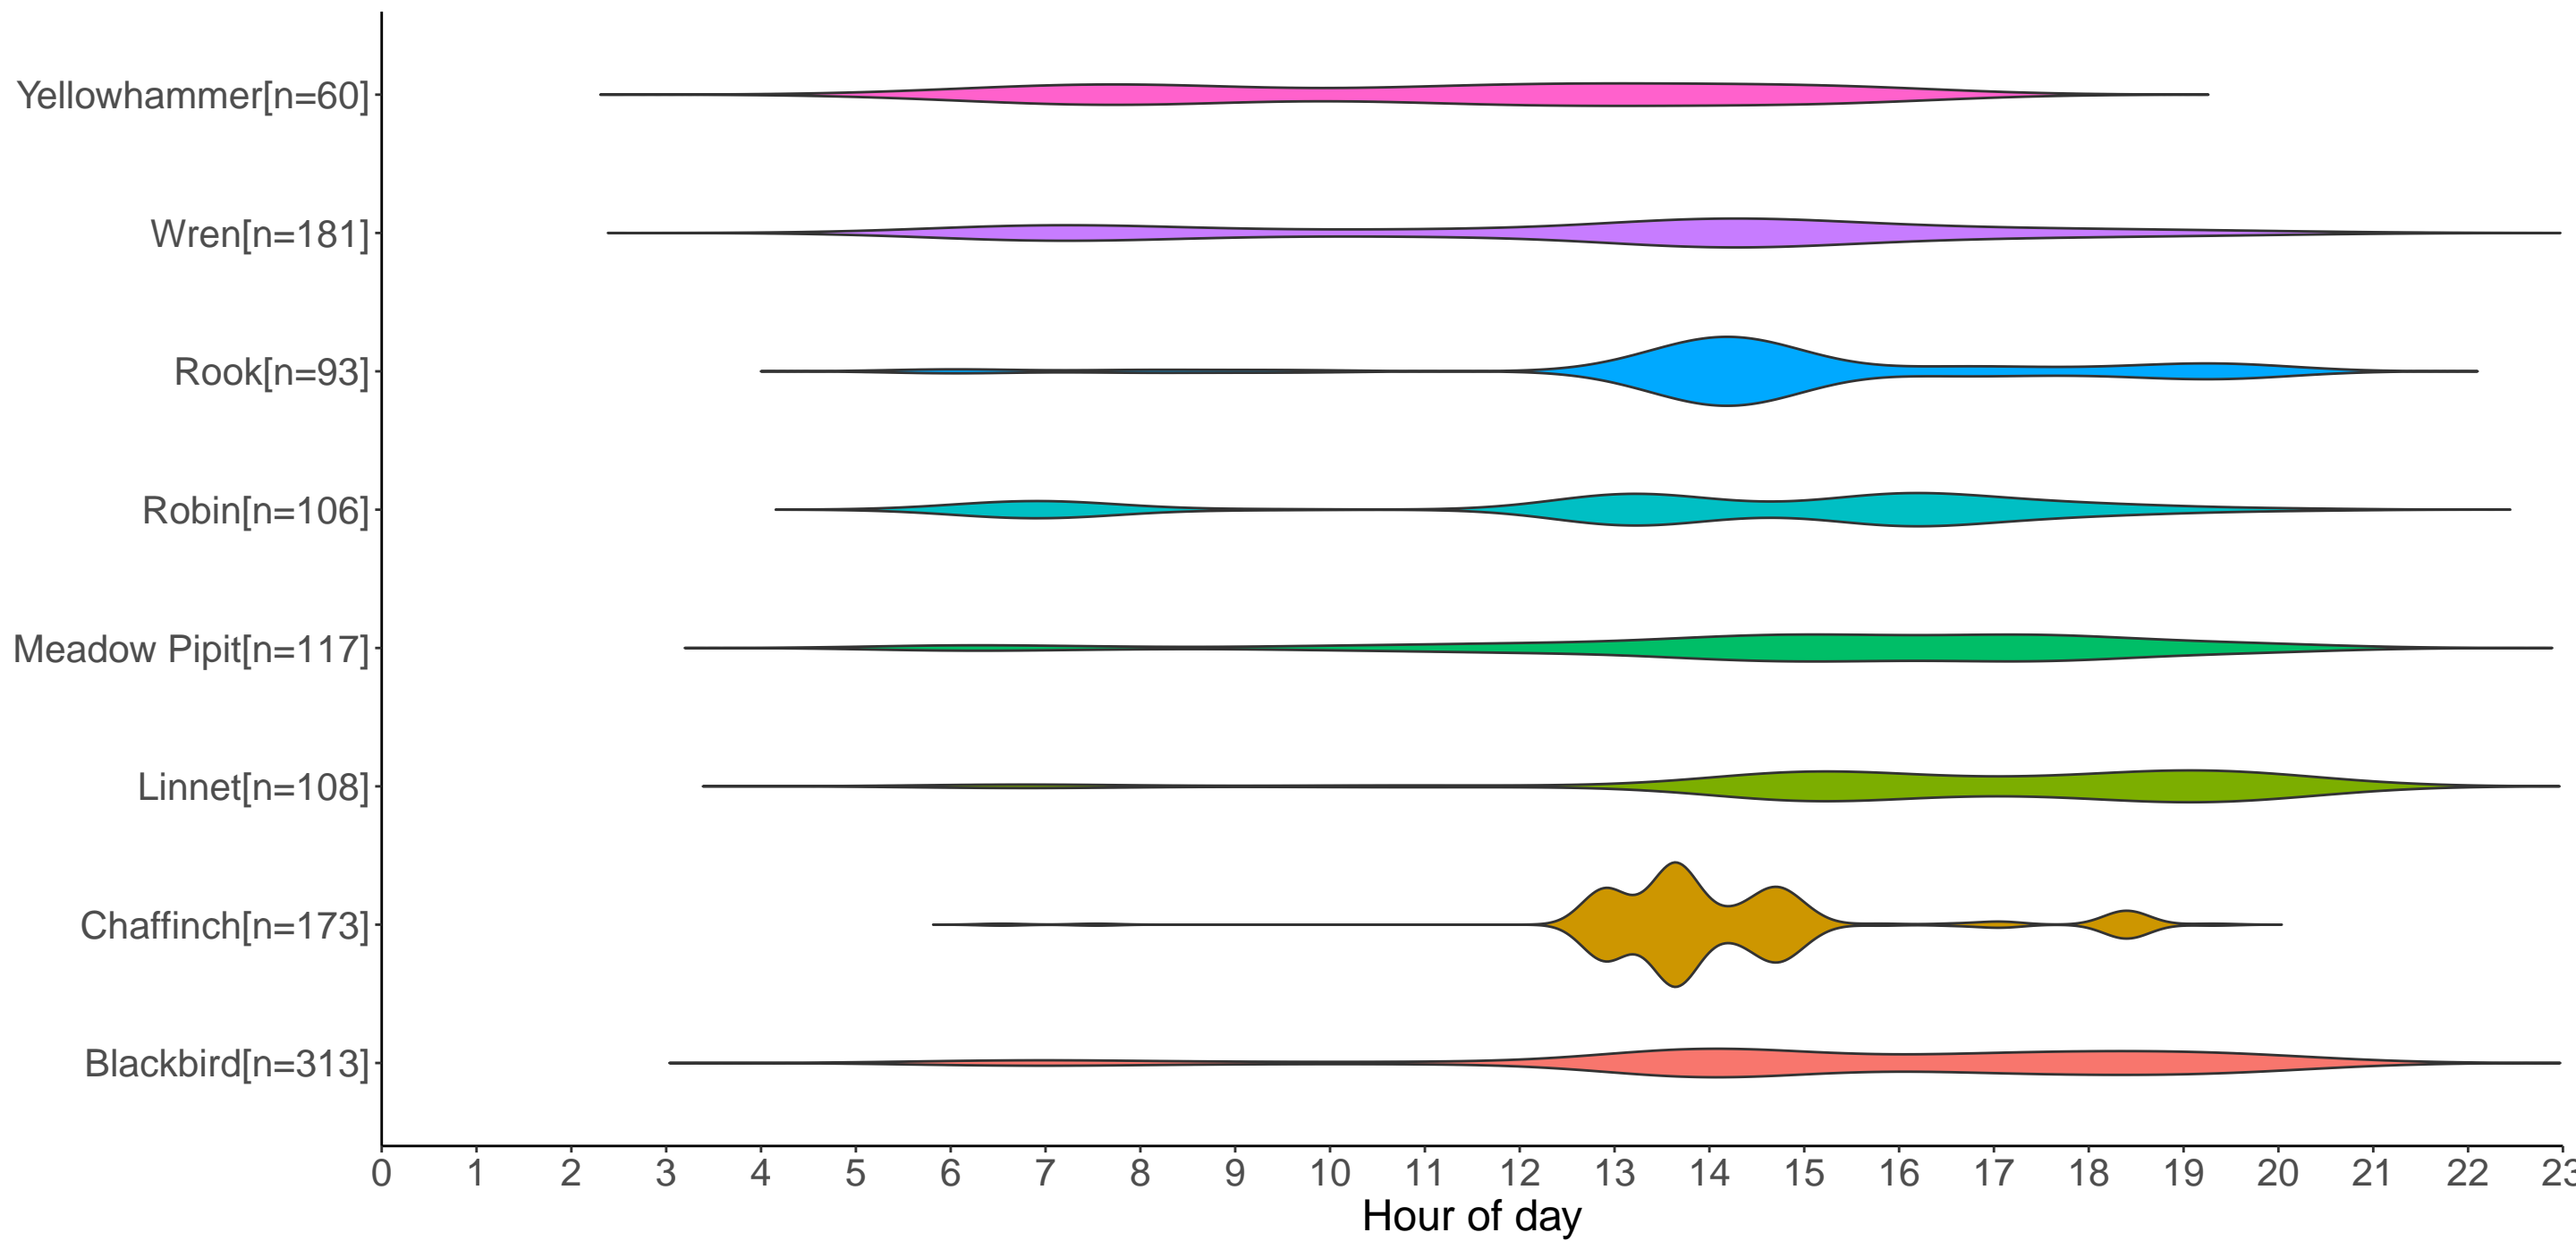

Supplement: class_violin_plot.pdf [file class_violin_plot.pdf]
