# Supplementary material for: NEAL: an open-source tool for audio annotation
Source: PeerJ journal article supplement (doi:10.7717/peerj.15913), 2023-08-25

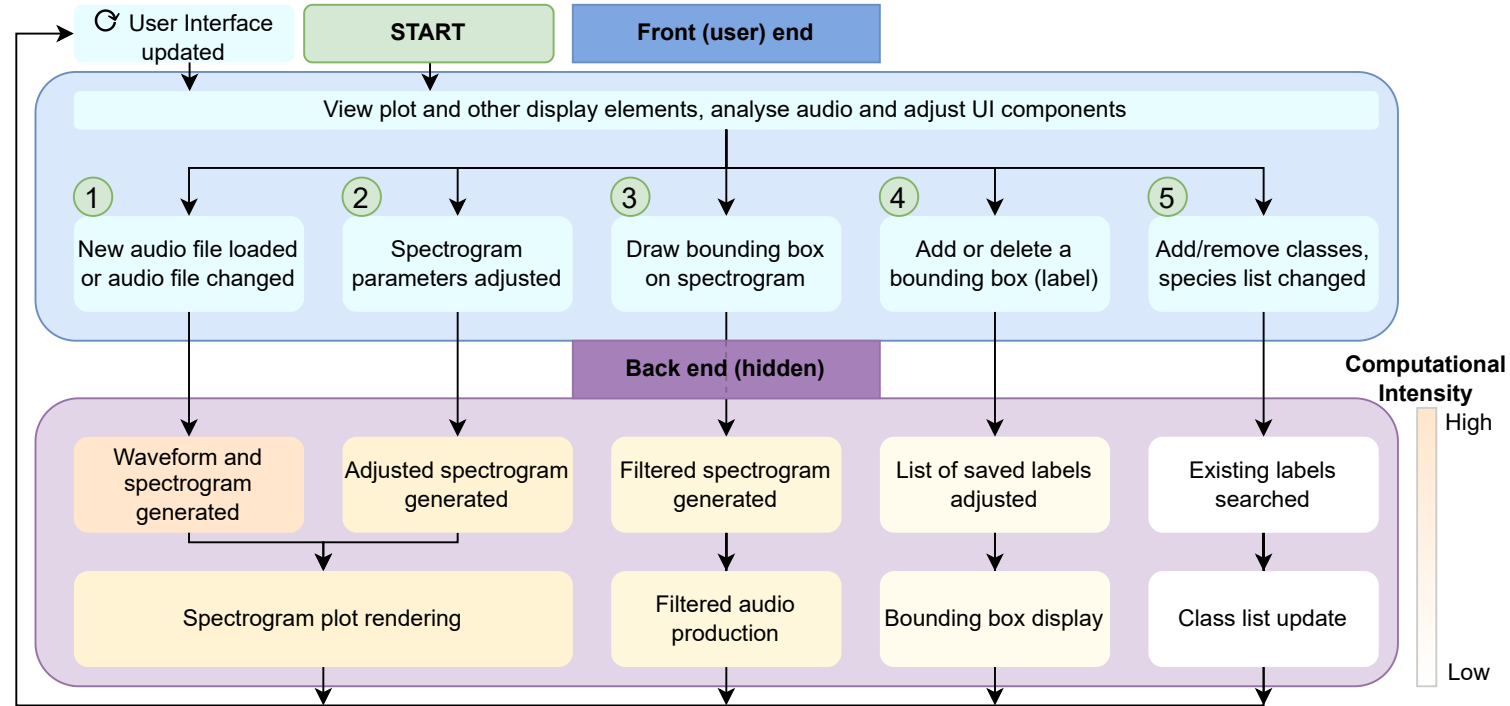

Supplement: workflow_diagram_v3.pdf [file workflow_diagram_v3.pdf]
